# Supplementary material for: Epidural Electrical Stimulation Of The Cervical Dorsal Roots Restores Voluntary Arm Control In Paralyzed Monkeys
Source: Research Square preprint supplement (doi:10.21203/rs.3.rs-395156/v1), 2021-04-19
Supplement: Supplementary file 1 [file b14900b2965f054a9b3ea5b0.pdf]

## Supplementary data

| Animal ID    | Sex | Age  | Weight | SCI | Anesthetized Experiments                      | Behavioral experiments | Brain array position | Brain - Controlled EES |
|--------------|-----|------|--------|-----|-----------------------------------------------|------------------------|----------------------|------------------------|
| <b>Mk-Sa</b> | F   | 9 Yr | 4 kg   | yes | Recruitment curves                            | Reach only             | M1 and PMd           | no                     |
| <b>Mk-Br</b> | F   | 3 Yr | 3.4 kg | yes | Recruitment curves and single joint movements | Reach and pull         | S1, M1 and PMv       | yes                    |
| <b>Mk-Yg</b> | F   | 3 Yr | 2.9 kg | yes | Recruitment curves and single joint movements | Reach and pull         | S1, M1 and PMv       | yes                    |

**Supplementary Table 1:** Identification information, license numbers, characteristics and type of procedure performed for the three monkeys involved in the study

**Video 1:** Single-joint movements elicited by pulse trains of EES at different segmental locations. Shoulder abduction: stimulation at C5; Elbow extension: stimulation at C7; Finger flexion: stimulation at T1; reach, grasp and pull sequence: cascade stimulation at C7, T1 and C5.

**Video 2:** Effects of EES on reach movement performance on Mk-Sa. Top left: lateral vision of the animal performing the task; Bottom left: delivered stimulation pulses; Top right: electromyographic activity from Deltoid, Biceps and Triceps muscles; Bottom right: neural activity from M1 and PMd cortex.

**Video 3:** Effects of brain-controlled EES on reach and pull movement performance on Mk-Br Top left: lateral vision of the animal performing the task; Middle left: delivered stimulation pulses; Bottom left: pulling force applied on the robot end effector; Top right: neural activity from S1, M1 and PMd cortex; Bottom right: electromyographic activity from Deltoid, Flexor Carpi radialis and Abductor Pollicis.

**Video 4:** Effects of EES on pull movement performance on Mk-Yg. Top left: lateral vision of the animal performing the task; Middle left: delivered stimulation pulses; Bottom left: pulling force applied on the robot end effector; Top right: neural activity from S1, M1 and PMd cortex; Bottom right: electromyographic activity from Biceps, Triceps, Extensor Digitorum Communis and Flexor Digitorum Superficialis.

**Video 5:** Effects of a EES burst optimized to recover pull, delivered during a reach movement on Mk-Yg. Lateral view of the animal performing the task.

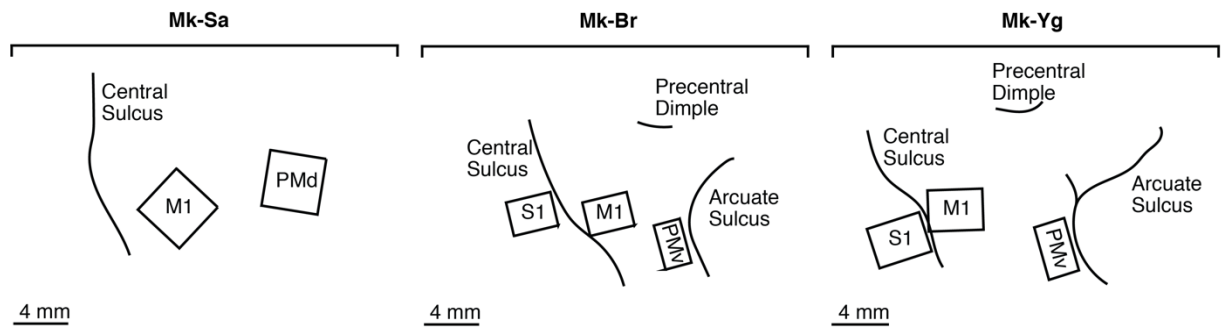

**Supplementary Figure 1: Position of intracortical arrays.** Location of intracortical arrays implanted in the sensory (S1), Motor (M1) and dorsal or ventral premotor (PMd, PMv) cortex in the three monkeys.
